# Supplementary material
Source: PubMed Central journal article supplement (PMC2878555)
Supplement: supp_M109.069351_jbc.M109.069351-1.pdf [file supp_M109.069351_jbc.M109.069351-1.pdf]

### **Supplemental Material:**

- Text: -Supplemental Results

- Supplemental Figures S1-S7

- Supplemental Table S1+S2

- References for the Supplemental Information

### **Supplemental Results**

#### **Three plausible mechanisms for substrate-dependence of autonomy ruled out**

Several possible mechanisms for substrate-dependence of autonomy were considered. The difference in autonomy toward AC2 and syntide2 could be caused by an effect on stimulated activity. Indeed, AC2 and syntide2 differed more in stimulated than in autonomous phosphorylation rates (Fig. 2A). However, two other substrates with similar or lower stimulated phosphorylation than AC2 showed the same autonomy as syntide2 (~25%)( Fig. 2B). Thus, stimulated activity was not a predictor of autonomy. The difference in autonomy could be caused by differential effects of pre-phosphorylation at T286 on stimulated maximal activities (increased for AC2 and/or decreased for syntide2). However, Fig. 2C demonstrates that this was not the case; this was further validated by a comparison of CaMKII wild type to the non-phosphorylatable T286A mutant (Fig. 2D). Importantly, the auto-phosphorylation conditions in Fig. 2C induced pre-phosphorylation of T286 but not T305, which would decrease stimulated activity by interfering with CaM binding (1-3). However, presence of AC2 could enhance T305 auto-phosphorylation during the activity assay, and thereby decrease stimulated activity and indirectly enhance autonomy. However, T305 phosphorylation under stimulated activity assay conditions was low and further decreased by both substrate peptides, and actually even more so by AC2 than by syntide2 (Fig. 2E,F). Thus, taken together, substrate-dependent autonomy was a function of autonomous, but not stimulated CaMKII activities. Elevated autonomy towards AC2

was found to depend on additional T-site interaction, while autonomy towards “regular” substrates was consistently low (Fig. 1).

### **Substrate-concentration dependence of CaMKII autonomy.**

Substrate-concentration dependence of stimulated and autonomous CaMKII activity was assessed for syntide2 and AC2 (Fig. 5A) as well as hAKb-nn and th19 (Fig. S4), two peptides derived from human AKAP79 and tyrosine hydroxylase, respectively (see Table S2). Two results are shown in the traditional linear double-reciprocal Lineweaver-Burke plot (4)(Fig. 5A, S4). However, the calculation of  $V_{max}$  and  $K_m$  based on linear regression in a double-reciprocal plot is error prone. Thus, for the actual calculation of  $V_{max}$  and  $K_m$ , the more reliable method of non-linear regression in a non-reciprocal plot was used. The functions shown in Fig. 5A and S4 are based on these values (see also Table S2).

With known kinetic parameters for stimulated and autonomous activity (Table S2), CaMKII autonomy as function of substrate concentration (as in Fig. 5B) can be calculated based on the Michaelis-Menten equation:

$$V = V_{max} \cdot \left( \frac{[S]}{([S] + K_m)} \right)$$

Then, autonomy (expressed as ratio instead of %) is:

$$Aut = \frac{V_{aut}}{V_{stim}} = \frac{V_{max a}}{V_{max s}} \cdot \frac{\left( \frac{[S]}{([S] + K_{ma})} \right)}{\left( \frac{[S]}{([S] + K_{ms})} \right)} = \frac{V_{max a}}{V_{max s}} \cdot \frac{([S] + K_{ms})}{([S] + K_{ma})} = rV_{max} \cdot \frac{([S] + K_{ms})}{([S] + (rK_m \cdot K_{ms}))}$$

$$\left( \text{with } rV_{max} = \frac{V_{max a}}{V_{max s}} \quad \text{and} \quad rK_m = \frac{K_{ma}}{K_{ms}} \right)$$

resulting in a sigmoid function between minimal and maximal asymptotes, defined as:

$$Aut_{\min} = \frac{rV_{\max}}{rK_m} \quad \text{and} \quad Aut_{\max} = rV_{\max}$$

Thus, with a change in both  $V_{\max}$  and  $K_m$  (Fig. 5A, S4), CaMKII autonomy is substrate concentration-dependent, but remains near constant both in the low and in the high range of substrate concentration, with a significant change only within a relatively narrow range between (Fig. 5B). It is noteworthy that the cellular concentration of virtually all substrates proteins falls into the low stable range observed here for all “regular” substrates. However, autonomy in the high stable range could occur within cells based on optimized co-localization of kinase and substrate.

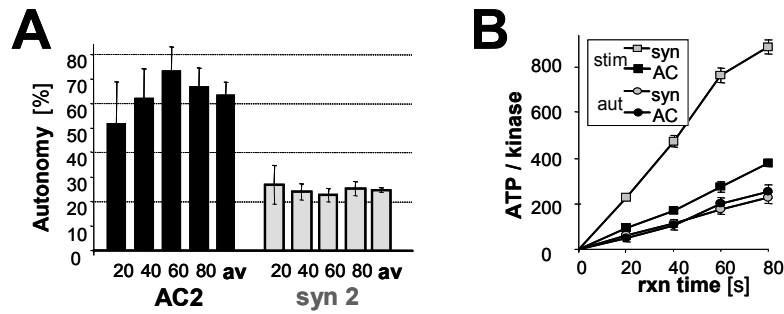

FIGURE S1. **CaMKII autonomy is substrate dependent.**

A, Degree of CaMKII autonomy towards AC2 and syntide2 at different reaction times, from 20 to 80 seconds (compare Fig. 1D).

B, Phosphorylation rates of AC2 and syntide by stimulated and autonomous CaMKII in the timecourse shown in panel A and Fig. 1D. Error bars indicate s.e.m in all panels.

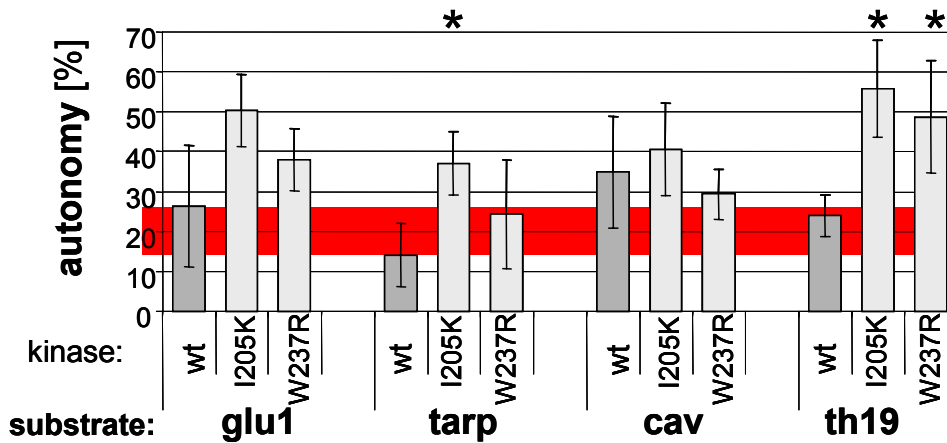

FIGURE S2. **The T-site mutations I205K and W237 did not reduce autonomy of mGFP-CaMKII $\alpha$  (10 nM) towards several “regular” substrates (75  $\mu$ M).** This is in contrast to the reduction seen for AC2 substrate, but similar to syntide2, another regular substrate (see Fig. 3D). For regular substrates, there was a general trend towards increased autonomy by the mutations, which became statistically significant in some cases (asterisks;  $p < 0.05$ ). If any, this further enhances the conclusion regarding T-site dependence of the high autonomy towards AC2. The reverse effect on autonomy towards regular substrates by the T-site mutations is consistent with reduced inhibitory interaction with the region around T286 (which binds to the T-site in the basal state). Details on the substrate peptides examined in this Figure are provided in Table S1. The autonomy range of 15-25% expected for regular substrates is indicated by a red bar. Compared to AC2, rate of stimulated phosphorylation of these peptides was 20-40 fold lower.

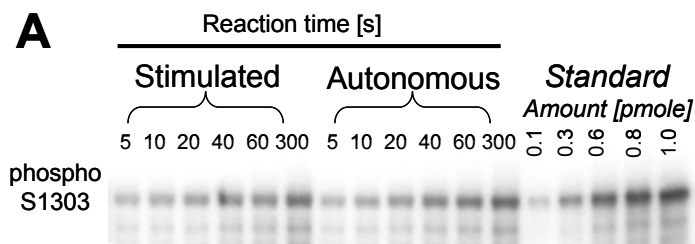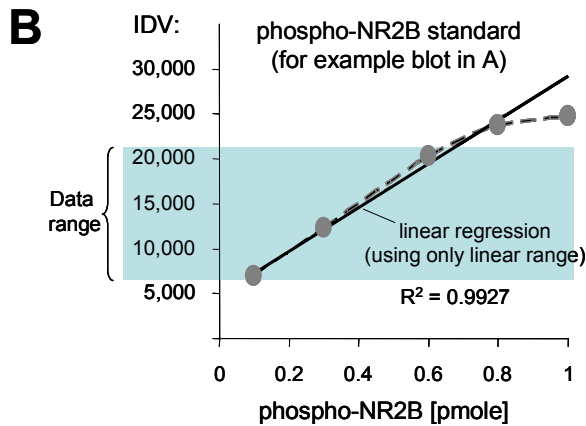

**FIGURE S3. NR2B Phospho-S1303 detection was in the linear range of the Western blot analyses**, demonstrating that it was indeed the reaction, not the detection, that was not in the linear range in Fig. 3.

**A**, Phosphorylation of GST-NR2B-c (a GST fusion protein with cytoplasmic C-terminus of NR2B; 0.5  $\mu$ M) at S1303 by stimulated and autonomous CaMKII (5 nM) activity after different reaction times, as determined by Western-blot analysis with a phospho-S1303 specific antibody. For each reaction, 0.6 pmole NR2B was loaded. The standard (NR2B phosphorylated for 30 min at 30°C with CaMKII) covered 0.1-1.0 pmole, and allowed comparison between blots and quantification.

**B**, The phospho-NR2B standard was in the linear range between 0.1 and 0.8 pmole. In order to determine the phospho-NR2B immuno detection value (IDV), the background immunoreaction with 0.6 pmole un-phosphorylated NR2B ( $\sim 1/3$  of the raw IDV of the 5 s reaction time) was subtracted for each sample; for each standard, a weighted background (according to amount in the standard lane) was subtracted. As all data values were below the 0.8 pmole standard, the 1.0 pmole was not included in the calculation of the linear regression used to calculate the phospho-NR2B pmole equivalents in the samples.

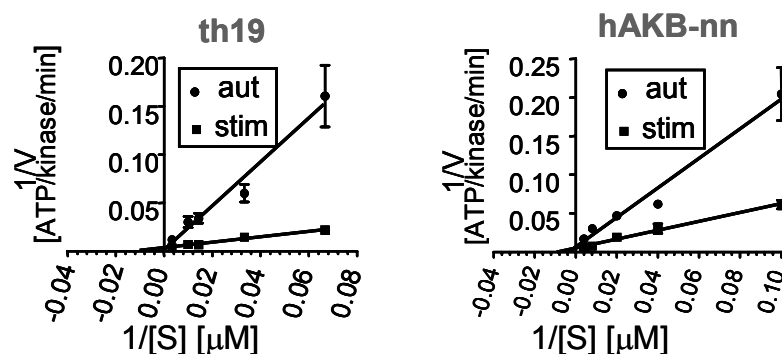

**FIGURE S4. Double reciprocal plot of phosphorylation rate as function of substrate concentration for stimulated and autonomous CaMKII activity, for the substrates hAKb-nn (derived from human AKAP79) and th19 (derived from tyrosine hydroxylase; see also Table S1).** As for the regular substrate syntide2, in both cases autonomous CaMKII activity showed lower  $V_{max}$  and higher  $K_m$  than stimulated activity (compare also Fig. 5 and Table S2).

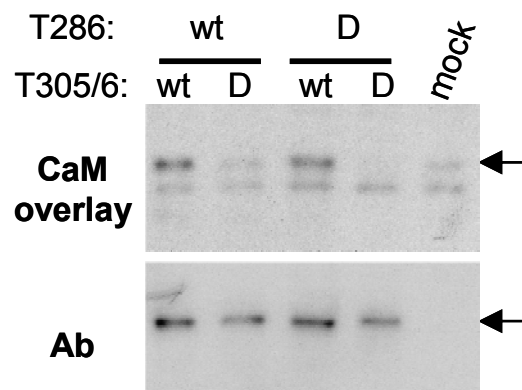

FIGURE S5. **CaM binding to CaMKII is impaired by T305/306D mutation**, as assessed in an overlay assay with biotinylated CaM (upper panel). Extracts from mock-transfected HEK cells were loaded as negative control. Equal amount of GFP-CaMKII (arrow) were measured by GFP fluorescence in the extracts, and verified by re-probing the blot with an anti-GFP antibody (Ab; lower panel).

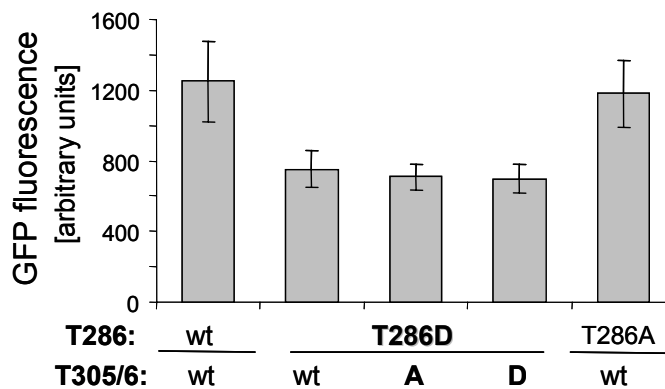

FIGURE S6. **Relative expression levels of GFP-CaMKII $\alpha$  mutants in differentiated PC12 cells**, as assessed by average GFP fluorescence intensities in individual transfected cells (n=20 to 23; see Fig. 7A for example picture). The three constructs containing the T286D mutant show identical expression levels, but  $\sim 1/3$  less than CaMKII wild type and the T286A mutant (ANOVA with Bonferroni post-hoc analysis). Error bars show s.e.m.

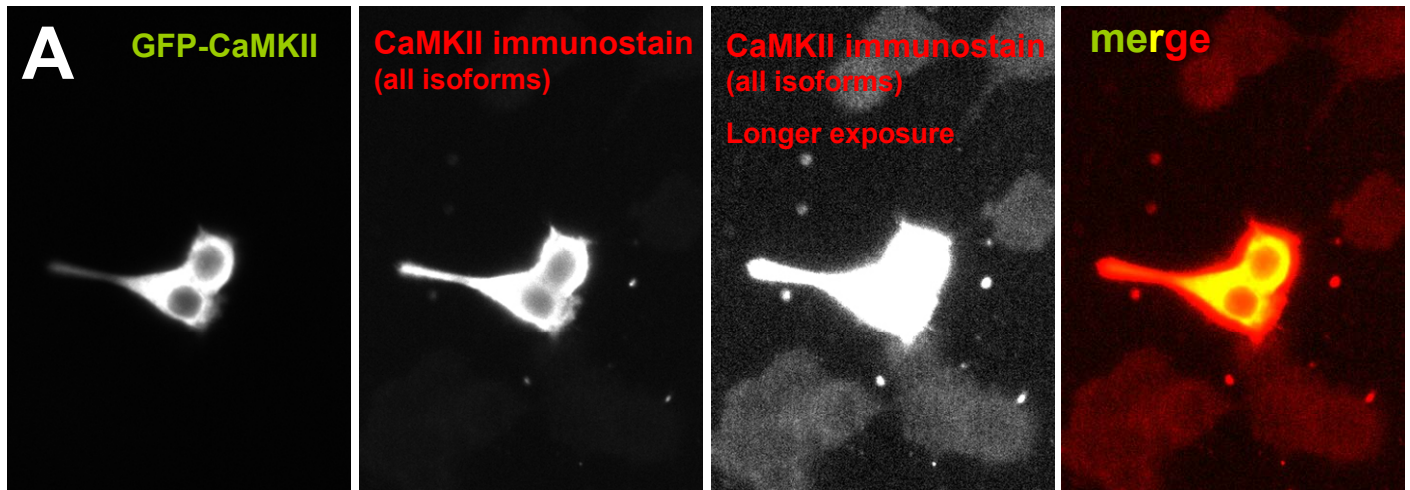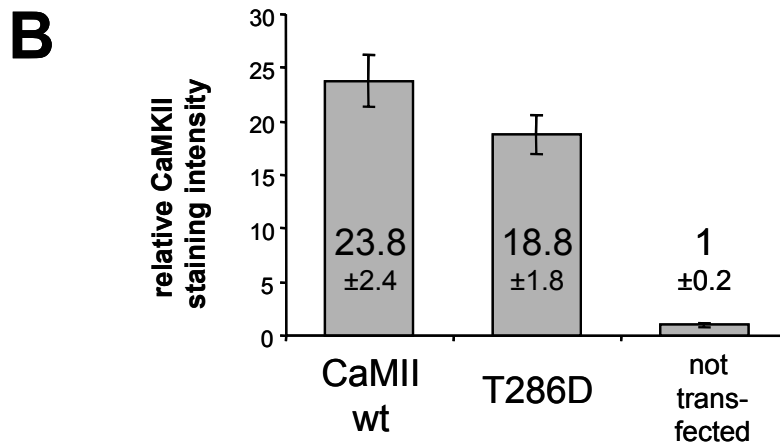

**FIGURE S7. Levels of overexpressed versus endogenous CaMKII in differentiated PC12 cells,** as assessed by immunocytochemistry of transfected cells compared to their untransfected neighbors.

**A,** Example micrographs. Transfected PC12 were identified by GFP fluorescence (left panel). PC12 cells were stained with an antibody against all CaMKII isoforms (BD Biosciences; middle panels). Visualization of untransfected cells required longer exposures (right panels).

**B,** Quantification of CaMKII immunostaining from experiments as shown in panel A showed that transfection of PC12 resulted in ~20fold overexpression of GFP-CaMKII over endogenous CaMKII expression.

TABLE S1. The CaMKII substrates used in this study, and their functions.

| Peptide                      | Sequence                                                                                                                            | Protein site          | Protein Function                | Phosphorylation Function                                         | References |
|------------------------------|-------------------------------------------------------------------------------------------------------------------------------------|-----------------------|---------------------------------|------------------------------------------------------------------|------------|
| AC2                          | KKALRRQ <u>E</u> TVDAL                                                                                                              | CaMKII T286           | Protein kinase                  | Generates CaMKII autonomy                                        | (5-10)     |
| syn2                         | PLARTL <u>S</u> VAGLPGKK                                                                                                            | GS S8                 | Glycogen synthase               | Inhibits activity                                                | (11,12)    |
| NR2B                         | (190 kDa protein)                                                                                                                   | S1303                 | NMDA-receptor subunit           | Regulation of channel desensitization                            | (13,14)    |
| MAP2                         | (200 kDa protein)                                                                                                                   | > 10 sites            | Microtubule regulation          | Regulation of microtubule stability                              | (15-17)    |
| hAKb-wt                      | <b>A</b> WAS <b>L</b> KRLV <b>T</b> RRKRSE <u>S</u> SK                                                                              | AKAP79 T87            | PKA, PKC, PP2B targeting        | Interferes with CaM and F-actin binding                          | (18-21)    |
| -“ - -nn                     | <b>A</b> NAS <b>N</b> KRLV <b>T</b> RRKRSE <u>S</u> SK                                                                              | -“ -                  |                                 |                                                                  |            |
| -“ - -np                     | <b>A</b> NAS <b>P</b> KRLV <b>T</b> RRKRSE <u>S</u> SK                                                                              | -“ -                  |                                 |                                                                  |            |
| glu1                         | LIPQQ <u>S</u> INEAI                                                                                                                | GluR1 S831            | AMPA-receptor subunit           | Increases single channel conductance                             | (22,23)    |
| tarp                         | TEASPSRDA <u>S</u> PVGL                                                                                                             | Tarp $\gamma$ -4 S259 | AMPA-receptor regulator         | Increase of synaptic strength                                    | (24)       |
| cav                          | YLTRDW <u>S</u> ILGP                                                                                                                | CaV1.2 S439           | L-type Ca <sup>2+</sup> channel | Mode 2 gating; Timothy Syndrome                                  | (25,26)    |
| th19                         | AKGFRRAV <u>S</u> ELDA                                                                                                              | TH S19                | Tyrosine hydroxylase            | Increases activity, the rate-limiting step in dopamine synthesis | (27,28)    |
| Consensus<br>CaMKII<br>site: | <i>h</i> xRn <u>x</u> <b>S</b> / <b>T</b> <i>h</i><br><i>h</i> : hydrophobic<br><i>n</i> : non-basic (not R or K)<br><i>x</i> : any |                       |                                 |                                                                  |            |



TABLE S2. **Kinetic parameters used for the plot of CaMKII autonomy**  
as a function of substrate concentration (in Fig. 5B)

| <i>Parameter</i>        | Substrate:       |             |             |                |
|-------------------------|------------------|-------------|-------------|----------------|
|                         | <b>Syntide-2</b> | <b>AC2</b>  | <b>th19</b> | <b>hAKb-nn</b> |
| <i>rV</i> max           | 0.449            | 0.722       | 0.506       | 0.426          |
| <i>rK</i> m             | 1.991            | 1.245       | 2.995       | 1.524          |
| <i>K</i> m, <i>stim</i> | 26.3 $\mu$ M     | 8.9 $\mu$ M | 126 $\mu$ M | 151 $\mu$ M    |

*K*m,*stim* represents the *K*m of the substrate for Ca<sup>2+</sup>/CaM-stimulated CaMKII activity. The prefix *r* indicates the ratio of the autonomous to the stimulated value. The values for Syntide2 are based on four independent experiments. While the values for the autonomous and stimulated *V*max varied between experimental days, their ratio (*rV*max) was very consistent.

## References for the supplemental information

1. Colbran, R. J., and Soderling, T. R. (1990) Calcium/calmodulin-independent autophosphorylation sites of calcium/calmodulin-dependent protein kinase II. Studies on the effect of phosphorylation of threonine 305/306 and serine 314 on calmodulin binding using synthetic peptides, *J Biol Chem* **265**, 11213-11219
2. Hanson, P. I., and Schulman, H. (1992) Inhibitory autophosphorylation of multifunctional Ca<sup>2+</sup>/calmodulin-dependent protein kinase analyzed by site-directed mutagenesis, *J Biol Chem* **267**, 17216-17224
3. Lu, C. S., Hodge, J. J., Mehren, J., Sun, X. X., and Griffith, L. C. (2003) Regulation of the Ca<sup>2+</sup>/CaM-responsive pool of CaMKII by scaffold-dependent autophosphorylation, *Neuron* **40**, 1185-1197
4. Lineweaver, H., and Burk, D. (1934) The determination of enzyme dissociation constants, *J. Am. Chem. Soc.* **56**, 658-666
5. Lou, L. L., Lloyd, S. J., and Schulman, H. (1986) Activation of the multifunctional Ca<sup>2+</sup>/calmodulin-dependent protein kinase by autophosphorylation: ATP modulates production of an autonomous enzyme, *Proc Natl Acad Sci U S A* **83**, 9497-9501
6. Miller, S. G., and Kennedy, M. B. (1986) Regulation of brain type II Ca<sup>2+</sup>/calmodulin-dependent protein kinase by autophosphorylation: a Ca<sup>2+</sup>-triggered molecular switch, *Cell* **44**, 861-870
7. Hanson, P. I., Meyer, T., Stryer, L., and Schulman, H. (1994) Dual role of calmodulin in autophosphorylation of multifunctional CaM kinase may underlie decoding of calcium signals, *Neuron* **12**, 943-956
8. Hanson, P. I., and Schulman, H. (1992) Neuronal Ca<sup>2+</sup>/calmodulin-dependent protein kinases, *Annu Rev Biochem* **61**, 559-601
9. Hudmon, A., and Schulman, H. (2002) Neuronal CA<sup>2+</sup>/calmodulin-dependent protein kinase II: the role of structure and autoregulation in cellular function, *Annu Rev Biochem* **71**, 473-510
10. Lisman, J., Schulman, H., and Cline, H. (2002) The molecular basis of CaMKII function in synaptic and behavioural memory, *Nat Rev Neurosci* **3**, 175-190
11. Payne, M. E., and Soderling, T. R. (1980) Calmodulin-dependent glycogen synthase kinase, *J Biol Chem* **255**, 8054-8056
12. Hashimoto, Y., and Soderling, T. R. (1987) Calcium . calmodulin-dependent protein kinase II and calcium . phospholipid-dependent protein kinase activities in rat tissues assayed with a synthetic peptide, *Arch Biochem Biophys* **252**, 418-425
13. Omkumar, R. V., Kiely, M. J., Rosenstein, A. J., Min, K. T., and Kennedy, M. B. (1996) Identification of a phosphorylation site for calcium/calmodulin-independent protein kinase II in the NR2B subunit of the N-methyl-D-aspartate receptor, *J Biol Chem* **271**, 31670-31678
14. Sessoms-Sikes, S., Honse, Y., Lovinger, D. M., and Colbran, R. J. (2005) CaMKIIalpha enhances the desensitization of NR2B-containing NMDA receptors by an autophosphorylation-dependent mechanism, *Mol Cell Neurosci* **29**, 139-147
15. Schulman, H. (1984) Phosphorylation of microtubule-associated proteins by a Ca<sup>2+</sup>/calmodulin-dependent protein kinase, *J Cell Biol* **99**, 11-19

16. Vaillant, A. R., Zanassi, P., Walsh, G. S., Aumont, A., Alonso, A., and Miller, F. D. (2002) Signaling mechanisms underlying reversible, activity-dependent dendrite formation, *Neuron* **34**, 985-998
17. Sanchez, C., Diaz-Nido, J., and Avila, J. (2000) Phosphorylation of microtubule-associated protein 2 (MAP2) and its relevance for the regulation of the neuronal cytoskeleton function, *Prog Neurobiol* **61**, 133-168
18. this study,
19. Gomez, L. L., Alam, S., Smith, K. E., Horne, E., and Dell'Acqua, M. L. (2002) Regulation of A-kinase anchoring protein 79/150-cAMP-dependent protein kinase postsynaptic targeting by NMDA receptor activation of calcineurin and remodeling of dendritic actin, *J Neurosci* **22**, 7027-7044
20. Oliveria, S. F., Dell'Acqua, M. L., and Sather, W. A. (2007) AKAP79/150 anchoring of calcineurin controls neuronal L-type Ca<sup>2+</sup> channel activity and nuclear signaling, *Neuron* **55**, 261-275
21. Tavalin, S. J., Colledge, M., Hell, J. W., Langeberg, L. K., Huganir, R. L., and Scott, J. D. (2002) Regulation of GluR1 by the A-kinase anchoring protein 79 (AKAP79) signaling complex shares properties with long-term depression, *J Neurosci* **22**, 3044-3051
22. Benke, T. A., Luthi, A., Isaac, J. T., and Collingridge, G. L. (1998) Modulation of AMPA receptor unitary conductance by synaptic activity, *Nature* **393**, 793-797
23. Derkach, V., Barria, A., and Soderling, T. R. (1999) Ca<sup>2+</sup>/calmodulin-kinase II enhances channel conductance of alpha-amino-3-hydroxy-5-methyl-4-isoxazolepropionate type glutamate receptors, *Proc Natl Acad Sci U S A* **96**, 3269-3274
24. Tomita, S., Stein, V., Stocker, T. J., Nicoll, R. A., and Brecht, D. S. (2005) Bidirectional synaptic plasticity regulated by phosphorylation of stargazin-like TARPs, *Neuron* **45**, 269-277
25. Erxleben, C., Liao, Y., Gentile, S., Chin, D., Gomez-Alegria, C., Mori, Y., Birnbaumer, L., and Armstrong, D. L. (2006) Cyclosporin and Timothy syndrome increase mode 2 gating of CaV1.2 calcium channels through aberrant phosphorylation of S6 helices, *Proc Natl Acad Sci U S A* **103**, 3932-3937
26. Pitt, G. S. (2007) Calmodulin and CaMKII as molecular switches for cardiac ion channels, *Cardiovasc Res* **73**, 641-647
27. Griffith, L. C., and Schulman, H. (1988) The multifunctional Ca<sup>2+</sup>/calmodulin-dependent protein kinase mediates Ca<sup>2+</sup>-dependent phosphorylation of tyrosine hydroxylase, *J Biol Chem* **263**, 9542-9549
28. Bobrovskaya, L., Dunkley, P. R., and Dickson, P. W. (2004) Phosphorylation of Ser19 increases both Ser40 phosphorylation and enzyme activity of tyrosine hydroxylase in intact cells, *J Neurochem* **90**, 857-864
